# Supplementary material for: Detection of NSCLC biomarker miRNAs via localized catalytic hairpin self-assembly and laser-induced fluorescence on a microfluidic platform
Source: Royal Society of Chemistry journal article supplement (doi:10.1039/d5an00073d), 2025-01-01
Supplement: d5an00073d1.pdf [file d5an00073d1.pdf]

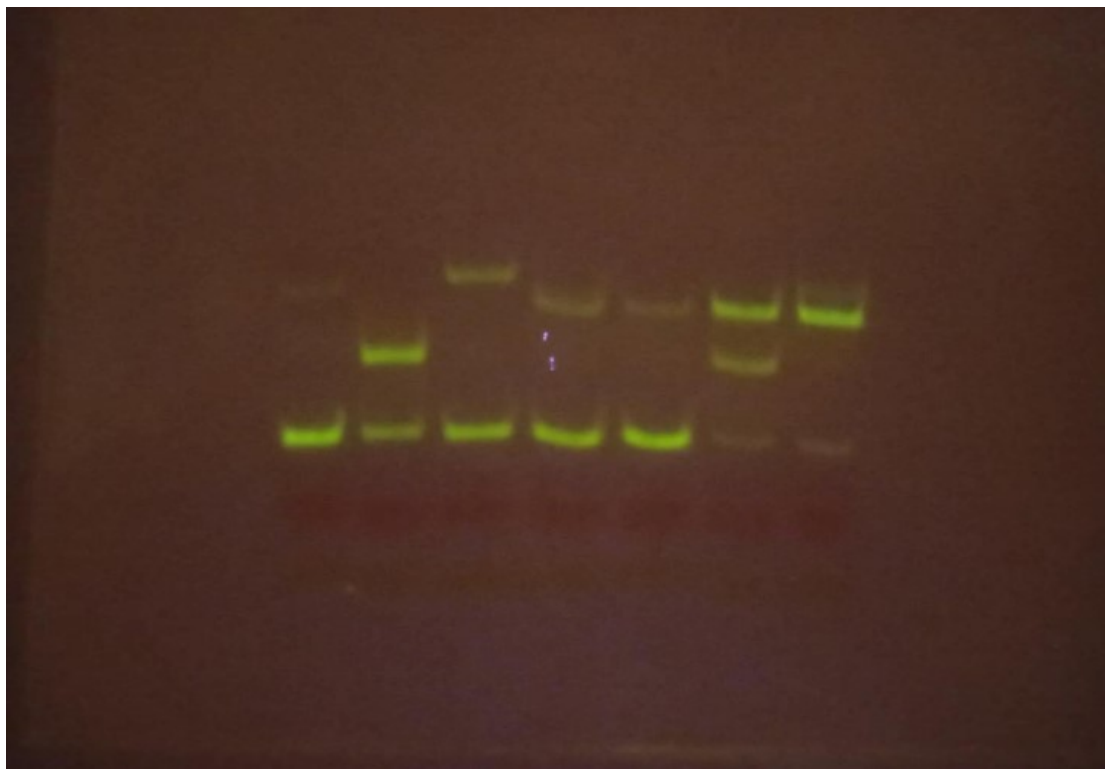

The CHA reaction was characterized by 10% Native PAGE and this is the original photograph.

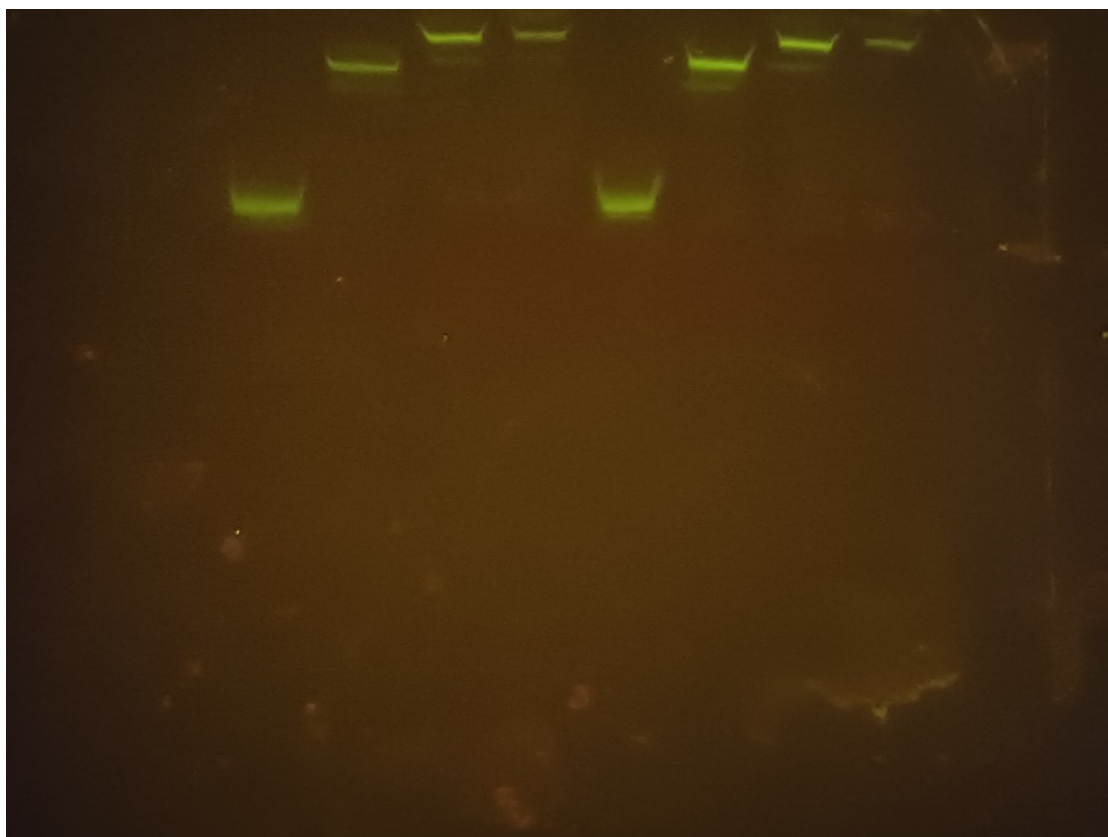

The design of DTPs was validated by 10% Native PAGE and this is the original photograph.
